# Supplementary material
Source: PubMed Central journal article supplement (PMC3226935)
Supplement: NIHMS325317-supplement-Supp_Table_S1.pdf [file NIHMS325317-supplement-Supp_Table_S1.pdf]

**Table I. Statistical comparison of the best performing 12 groups and the NAÏVE\_consensus method in QA1.1 mode (global quality estimates assessed on a per-target basis)**

|                         | <b>312</b> | <b>359</b> | <b>371</b> | <b>000</b> | <b>407</b> | <b>2</b> | <b>386</b> | <b>426</b> | <b>369</b> | <b>319</b> | <b>397</b> | <b>78</b> | <b>490</b> |
|-------------------------|------------|------------|------------|------------|------------|----------|------------|------------|------------|------------|------------|-----------|------------|
| <i>MUFOLD-WQA</i>       | <b>312</b> | X          | 116        | 116        | 116        | 116      | 113        | 116        | 116        | 116        | 116        | 116       | 113        |
| <i>MUFOLD-QA</i>        | <b>359</b> | 0.98       | X          | 116        | 116        | 116      | 113        | 116        | 116        | 116        | 116        | 116       | 113        |
| <i>QMEANclust</i>       | <b>371</b> | 0.86       | 0.70       | X          | 116        | 116      | 113        | 116        | 116        | 116        | 116        | 116       | 113        |
| <i>NAÏVE-consensus</i>  | <b>000</b> | 0.36       | 0.09       | <0.01      | X          | 116      | 113        | 116        | 116        | 116        | 116        | 116       | 113        |
| <i>United3D</i>         | <b>407</b> | 0.50       | 0.33       | 0.13       | 0.74       | X        | 116        | 113        | 116        | 116        | 116        | 116       | 113        |
| <i>Multicom-cluster</i> | <b>2</b>   | 0.30       | 0.06       | <0.01      | 0.44       | 0.61     | X          | 113        | 116        | 116        | 116        | 116       | 113        |
| <i>Mufold</i>           | <b>386</b> | 0.24       | <0.01      | <0.01      | 0.19       | 0.29     | 0.33       | X          | 113        | 113        | 113        | 113       | 113        |
| <i>MetaMQAPclust</i>    | <b>426</b> | 0.18       | 0.07       | 0.07       | 0.37       | 0.37     | 0.42       | 0.46       | X          | 116        | 116        | 116       | 113        |
| <i>MQAPmulti</i>        | <b>369</b> | 0.06       | 0.06       | 0.04       | 0.30       | 0.26     | 0.33       | 0.41       | 0.97       | X          | 116        | 116       | 113        |
| <i>Pcons</i>            | <b>319</b> | <0.01      | <0.01      | <0.01      | <0.01      | <0.01    | <0.01      | <0.01      | 0.22       | 0.18       | X          | 116       | 113        |
| <i>ModFOLDclust2</i>    | <b>397</b> | <0.01      | <0.01      | <0.01      | <0.01      | <0.01    | <0.01      | <0.01      | <0.01      | <0.01      | 0.22       | X         | 113        |
| <i>IntFOLD-QA</i>       | <b>78</b>  | <0.01      | <0.01      | <0.01      | <0.01      | <0.01    | <0.01      | <0.01      | <0.01      | <0.01      | 0.15       | <0.01     | X          |
| <i>MULTICOM</i>         | <b>490</b> | <0.01      | <0.01      | <0.01      | <0.01      | <0.01    | <0.01      | <0.01      | <0.01      | <0.01      | 0.14       | 0.42      | 0.53       |

Results of the two-tailed paired t-tests on Pearson’s correlation coefficients. The upper right part of the table contains the numbers of common targets predicted. The lower part displays the probability that the observed differences are due to chance. Shaded cells highlight pairs of statistically indistinguishable groups at the  $10^{-2}$  significance level.
