# Supplementary material
Source: PubMed Central journal article supplement (PMC3226935)
Supplement: NIHMS325317-supplement-Supp_Table_S2.pdf [file NIHMS325317-supplement-Supp_Table_S2.pdf]

**Table II. Statistical comparison of the best performing 12 groups and the NAÏVE\_consensus method in QA1.2 mode (global quality estimates assessed on models from all targets pooled together)**

|                         |            | <b>371</b> | <b>0</b> | <b>2</b> | <b>397</b> | <b>426</b> | <b>78</b> | <b>386</b> | <b>407</b> | <b>359</b> | <b>369</b> | <b>119</b> | <b>490</b> | <b>319</b> |
|-------------------------|------------|------------|----------|----------|------------|------------|-----------|------------|------------|------------|------------|------------|------------|------------|
| <i>QMEANclust</i>       | <b>371</b> | 35052      | 0.08     | 0.02     | <0.01      | <0.01      | <0.01     | <0.01      | <0.01      | <0.01      | <0.01      | <0.01      | <0.01      | <0.01      |
| <i>NAÏVE-consensus</i>  | <b>0</b>   | 2.53       | 35193    | 0.62     | <0.01      | <0.01      | <0.01     | <0.01      | 0.02       | 0.01       | 0.06       | <0.01      | <0.01      | <0.01      |
| <i>Multicom-cluster</i> | <b>2</b>   | 8.49       | 5.96     | 35158    | 0.05       | 0.01       | <0.01     | <0.01      | 0.07       | 0.04       | 0.15       | <0.01      | <0.01      | <0.01      |
| <i>ModFOLDclust2</i>    | <b>397</b> | 8.42       | 5.9      | 0.06     | 34964      | 0.18       | 0.02      | 0.6        | 0.9        | 0.94       | 0.61       | <0.01      | <0.01      | 0.34       |
| <i>MetaMQAPclust</i>    | <b>426</b> | 8.37       | 5.85     | 0.12     | 0.06       | 35102      | 0.32      | 0.41       | 0.14       | 0.2        | 0.06       | 0.24       | <0.01      | 0.68       |
| <i>IntFOLD-QA</i>       | <b>78</b>  | 13.54      | 11.03    | 5.08     | 5.13       | 5.2        | 34749     | 0.07       | 0.02       | 0.02       | <0.01      | 0.86       | <0.01      | 0.16       |
| <i>Mufold</i>           | <b>386</b> | 13.23      | 10.75    | 4.86     | 4.91       | 4.97       | 0.17      | 33363      | 0.52       | 0.65       | 0.3        | 0.05       | <0.01      | 0.68       |
| <i>United3D</i>         | <b>407</b> | 16.37      | 13.88    | 7.99     | 8.03       | 8.1        | 2.94      | 3.08       | 33517      | 0.84       | 0.71       | <0.01      | <0.01      | 0.29       |
| <i>MUFOLD-QA</i>        | <b>359</b> | 17.18      | 14.67    | 8.7      | 8.75       | 8.82       | 3.6       | 3.73       | 0.61       | 35152      | 0.56       | 0.01       | <0.01      | 0.38       |
| <i>MQAPmulti</i>        | <b>369</b> | 19.37      | 16.87    | 10.95    | 10.99      | 11.06      | 5.87      | 5.98       | 2.89       | 2.31       | 34141      | <0.01      | <0.01      | 0.14       |
| <i>Multicom-refine</i>  | <b>119</b> | 18.64      | 16.13    | 10.17    | 10.21      | 10.28      | 5.05      | 5.17       | 2.06       | 1.46       | 0.86       | 35158      | <0.01      | 0.11       |
| <i>MULTICOM</i>         | <b>490</b> | 17.65      | 15.15    | 9.23     | 9.27       | 9.34       | 4.15      | 4.28       | 1.19       | 0.59       | 1.71       | 0.87       | 34196      | <0.01      |
| <i>Pcons</i>            | <b>319</b> | 23.48      | 20.99    | 15.05    | 15.09      | 15.16      | 9.95      | 10.02      | 6.93       | 6.39       | 4.05       | 4.94       | 5.77       | 34420      |

Table II.1. Results of the Z-tests (below diagonal) and DeLong tests (above diagonal). Each group submitted QA1 quality estimates for the number of models shown on the diagonal. The Pearson's  $r$  coefficients were computed on this set of models and compared based on the distributions of their corresponding Fisher's Z (formula 5). Values of the Z statistics are shown in the lower part of the table. Grey cells highlight pairs of statistically indistinguishable groups at the  $10^{-2}$  significance level ( $Z < 2.576$ ). The upper part of the table displays  $p$ -values from the DeLong pairwise tests on the AUC scores, indicating probability that the difference in the performance of the best groups as binary classifiers (good/bad model) can be attributed to chance. Shaded cells highlight pairs of statistically indistinguishable groups at the  $10^{-2}$  significance level.
