# Supplementary material
Source: PubMed Central journal article supplement (PMC3226935)
Supplement: NIHMS325317-supplement-Supp_Table_S3.pdf [file NIHMS325317-supplement-Supp_Table_S3.pdf]

**Table S3. Statistical comparison of the best performing 12 groups in QA2.1 mode (per-residue quality estimates assessed on a per-target basis)**

|                           | <b>56</b>  | <b>397</b> | <b>78</b> | <b>426</b> | <b>369</b> | <b>490</b> | <b>273</b> | <b>80</b> | <b>324</b> | <b>308</b> | <b>119</b> | <b>367</b> |     |
|---------------------------|------------|------------|-----------|------------|------------|------------|------------|-----------|------------|------------|------------|------------|-----|
| <i>PconsM</i>             | <b>56</b>  | X          | 116       | 116        | 113        | 114        | 113        | 116       | 116        | 106        | 114        | 116        | 116 |
| <i>ModFOLDclust2</i>      | <b>397</b> | 0.01       | X         | 116        | 113        | 114        | 113        | 116       | 116        | 106        | 114        | 116        | 116 |
| <i>IntFOLD-QA</i>         | <b>78</b>  | <0.01      | <0.01     | X          | 113        | 114        | 113        | 116       | 116        | 106        | 114        | 116        | 116 |
| <i>MetaMQAPclust</i>      | <b>426</b> | <0.01      | 0.03      | 0.2        | X          | 113        | 110        | 113       | 113        | 105        | 113        | 113        | 113 |
| <i>MQAPmulti</i>          | <b>369</b> | <0.01      | <0.01     | 0.03       | 0.52       | X          | 111        | 114       | 114        | 106        | 114        | 114        | 114 |
| <i>MULTICOM</i>           | <b>490</b> | <0.01      | <0.01     | <0.01      | 0.05       | 0.1        | X          | 113       | 113        | 106        | 111        | 113        | 113 |
| <i>Pcomb</i>              | <b>273</b> | <0.01      | <0.01     | 0.03       | 0.16       | 0.27       | 0.33       | X         | 116        | 106        | 114        | 116        | 116 |
| <i>Multicom-construct</i> | <b>80</b>  | <0.01      | <0.01     | <0.01      | <0.01      | <0.01      | <0.01      | 0.62      | X          | 106        | 114        | 116        | 116 |
| <i>AOBA</i>               | <b>324</b> | <0.01      | <0.01     | <0.01      | <0.01      | <0.01      | <0.01      | 0.39      | 0.68       | X          | 106        | 106        | 106 |
| <i>MQAPsingle</i>         | <b>308</b> | <0.01      | <0.01     | <0.01      | <0.01      | <0.01      | <0.01      | 0.21      | 0.1        | 0.78       | X          | 114        | 114 |
| <i>Multicom-refine</i>    | <b>119</b> | <0.01      | <0.01     | <0.01      | <0.01      | <0.01      | <0.01      | 0.17      | 0.13       | 0.27       | 0.39       | X          | 116 |
| <i>ModFOLDclustQ</i>      | <b>367</b> | <0.01      | <0.01     | <0.01      | <0.01      | <0.01      | <0.01      | 0.01      | <0.01      | <0.01      | <0.01      | 0.04       | X   |

Results of the two-tailed paired t-tests on Pearson's correlation coefficients for per-residue estimates. The upper right part of the table contains the numbers of common targets predicted. The lower part displays the probabilities that the differences between the two correlation coefficients are due to chance. Shaded cells highlight pairs of statistically indistinguishable groups at the  $10^{-2}$  significance level.
