# Supplementary material
Source: PubMed Central journal article supplement (PMC3226935)

Targets containing FM domains or those where best model's GDT\_TS<40 are highlighted

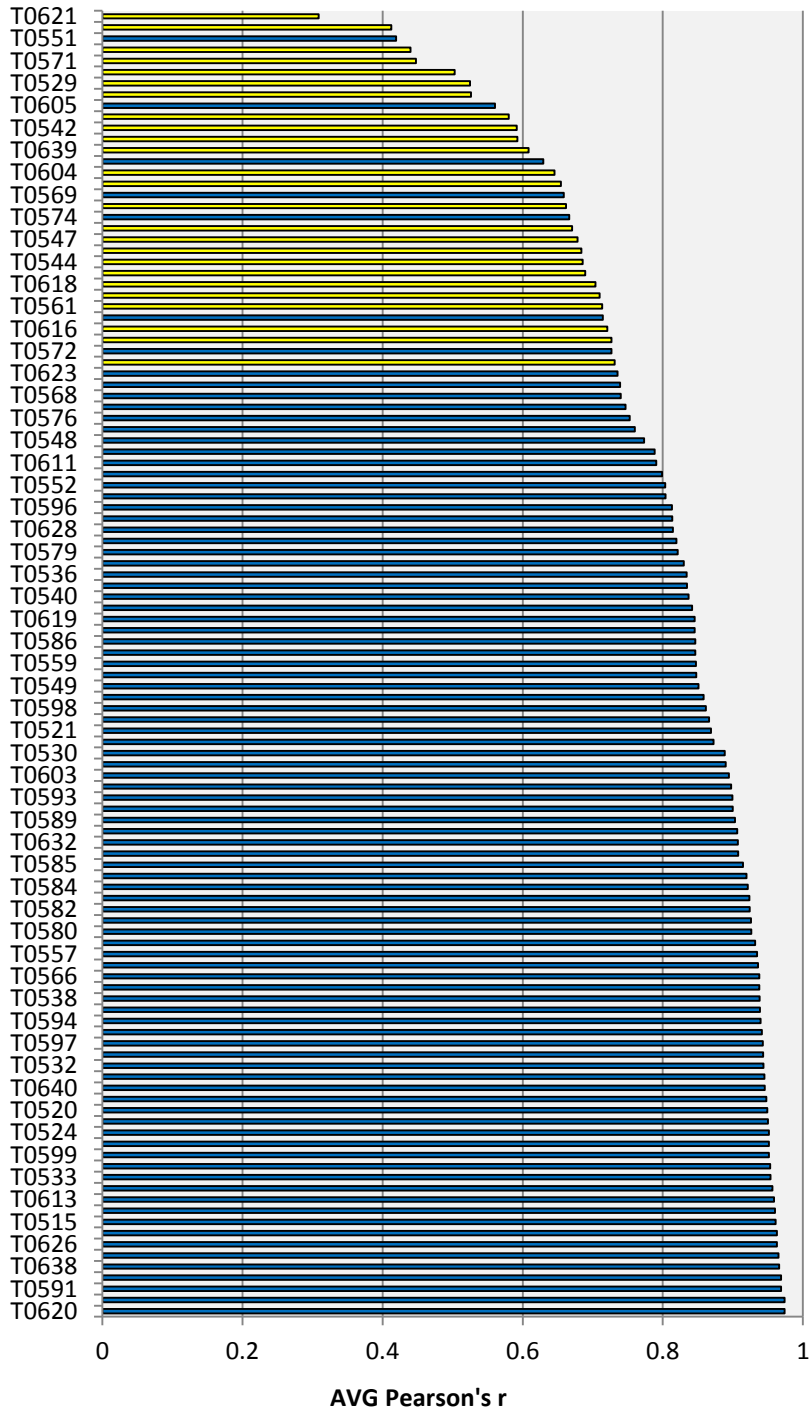

Supplement: NIHMS325317-supplement-Supp_Figure_S1.pdf [file NIHMS325317-supplement-Supp_Figure_S1.pdf]

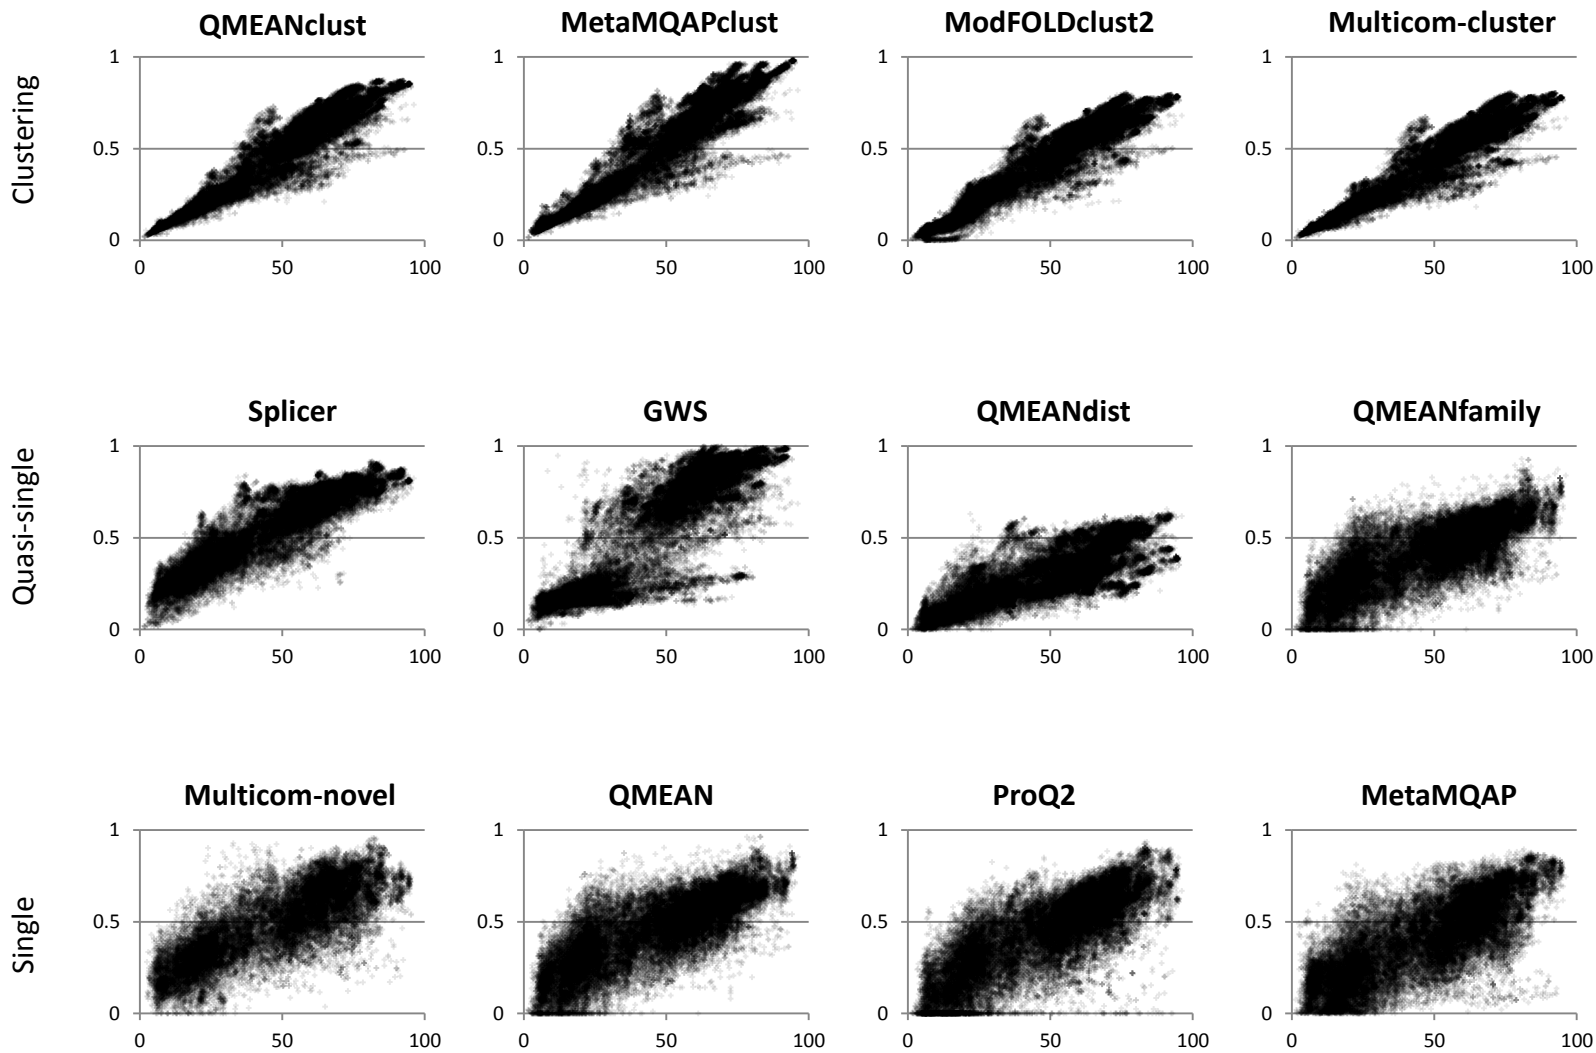

Supplement: NIHMS325317-supplement-Supp_Figure_S2.pdf [file NIHMS325317-supplement-Supp_Figure_S2.pdf]

Mean z-score on TBM targets

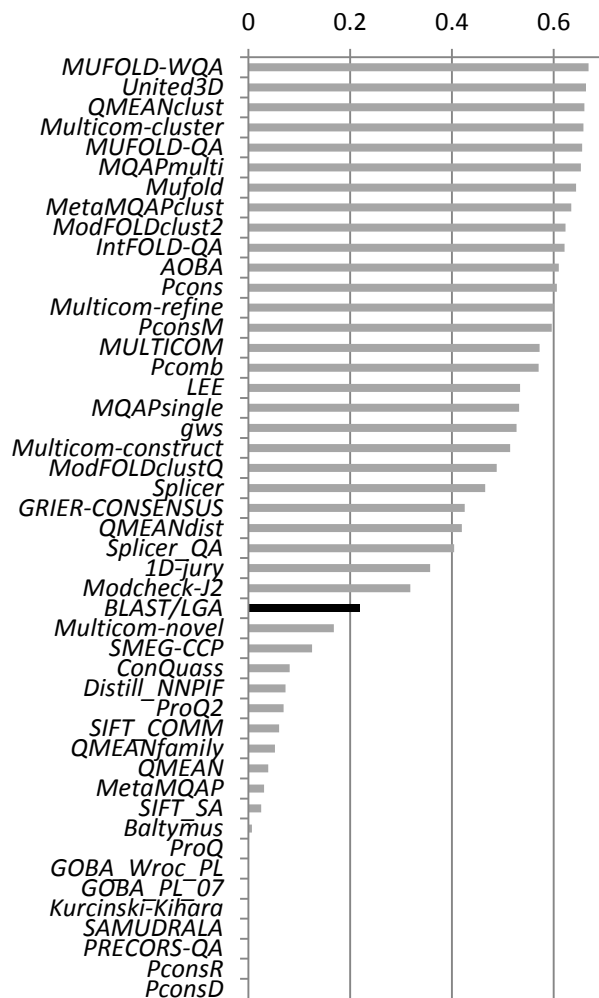

Supplement: NIHMS325317-supplement-Supp_Figure_S3.pdf [file NIHMS325317-supplement-Supp_Figure_S3.pdf]

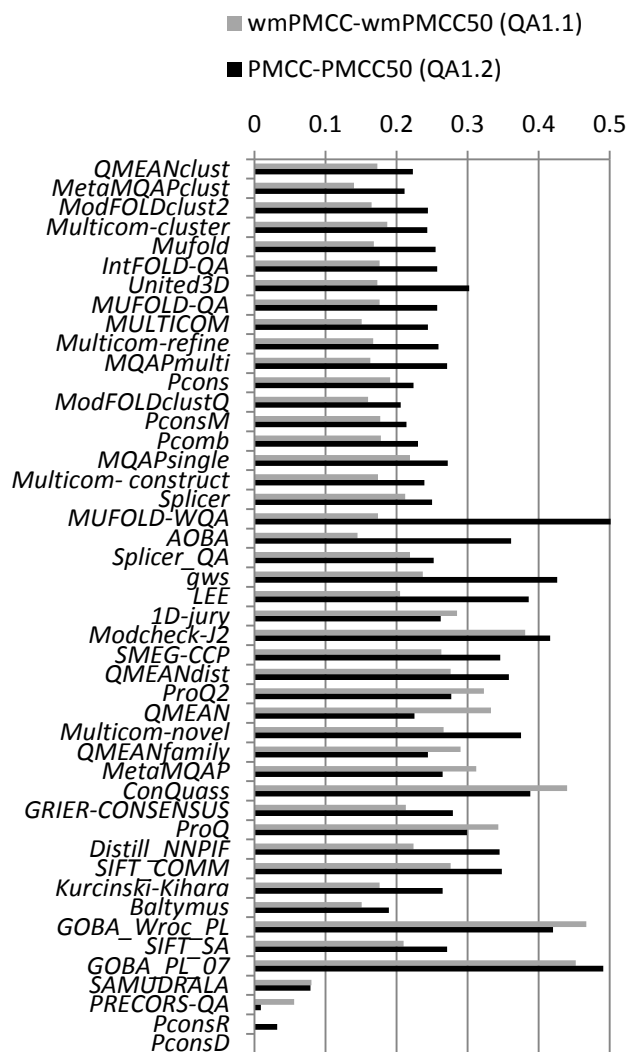

Supplement: NIHMS325317-supplement-Supp_Figure_S4.pdf [file NIHMS325317-supplement-Supp_Figure_S4.pdf]
